# Supplementary material for: Decreased Levels of GSH Are Associated with Platinum Resistance in High-Grade Serous Ovarian Cancer
Source: MDPI journal article supplement (doi:10.3390/antiox11081544), 2022-08-10
Supplement: s1 [file s1]

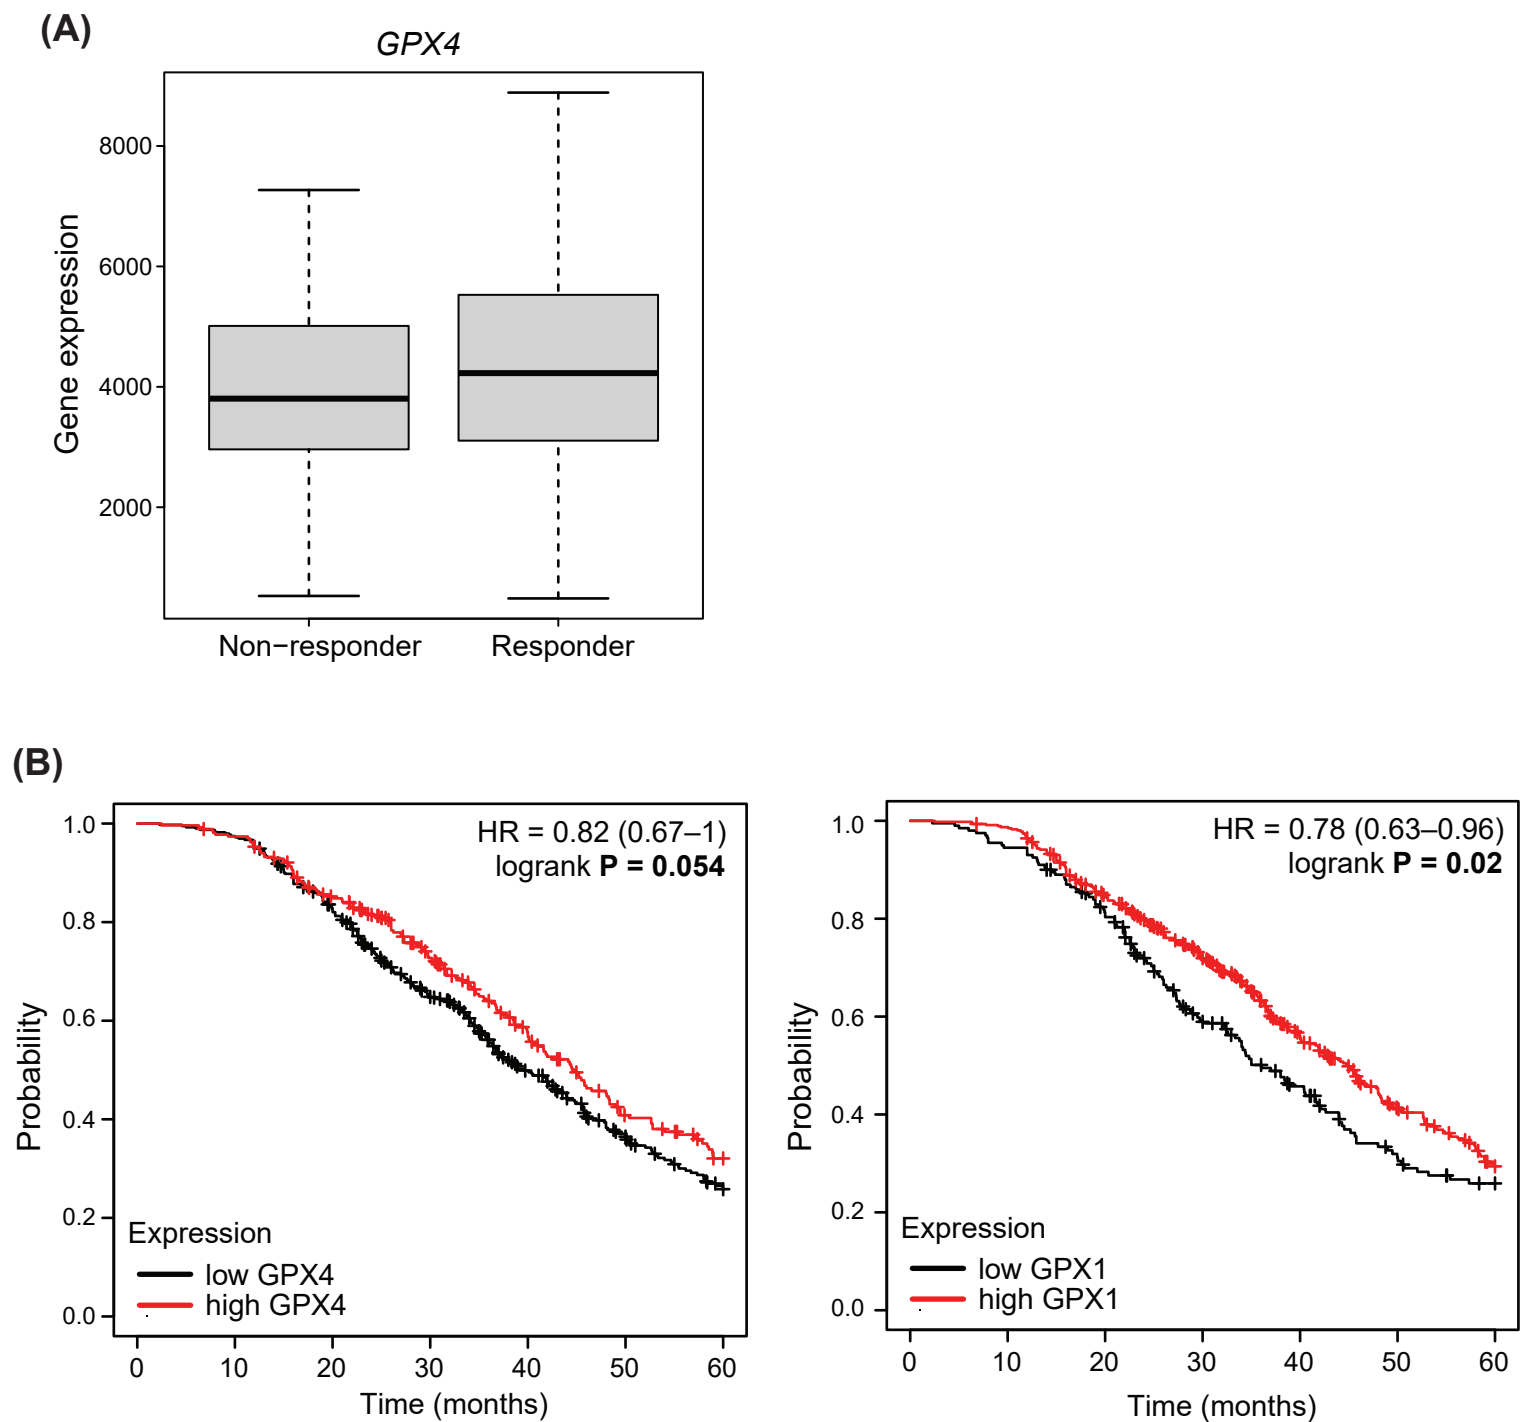

**FigureS1.** Antioxidant enzymes correlate with response to therapy and survival in HGSOC patients. **A)** Expression levels of GPX4 in HGSOC patients, grouped for their pathological response to platinum-based therapy (complete response vs residual disease after completing the therapy). Statistical significance of differences in gene expression levels in responders (n=461) and non-responders (n=115) was evaluated by the Mann-Whitney test. **B)** Kaplan-Meier estimates of survival obtained on Kaplan Meier plotter analyzing post-progression survival in HGSOC patients treated with platinum-based chemotherapy.
